# Supplementary material
Source: publisher site journal article supplement (https://www.dovepress.com/article/304869)
Supplement: Supplementary file 1 [file get_supplementary_file.php]

**Table**

**Supplementary Table 1 MSP Primer sequences**

| **MSP primer** | **Sense sequence (5’-3’)** | **Size**  **(bp)** | **Anti-sense sequence (5’-3’)** | **Size**  **(bp)** |
| --- | --- | --- | --- | --- |
| AGR2 (M) | AATTTGGTTTTTTATAGTGGTTCGT | 25 | AACTTAATACTTCTATTAATTAAACTCGTA | 30 |
| AGR2 (U) | AATTTGGTTTTTTATAGTGGTTTGT | 25 | TAACTTAATACTTCTATTAATTAAACTCAT | 30 |

**Supplementary Table 2 qRT-PCR Primer sequences**

| **Target gene** | **Primer (5'-3')** | **Size ( bp )** |
| --- | --- | --- |
| AGR2 | F: 5’-GTCAGCATTCTTGCTCCTTGT-3’ | 21 |
|  | R: 5’-GGGTCGAGAGTCCTTTGTGTC-3’ | 21 |
| β-actin | F: 5’-GGAGCGAGATCCCTCCAAAAT-3’ | 21 |
|  | R: 5’-GGCTGTTGTCATACTTCTCATGG-3’ | 23 |
